# Supplementary material
Source: MDPI journal article supplement (https://www.mdpi.com/2077-0472/12/3/355)
Supplement: s1 [file s1]

**Table S1.** Total results for each impact categories and farms for the production of one kilogram of eggs, using Environmental Footprint 3.0

|                                                                       | Battery 1              | Battery 2              | Battery 3              | Barn 1                 | Barn 2                 | Free range 1           | Free range 2           | Organic 1              | Organic 2              | Community garden       |
|-----------------------------------------------------------------------|------------------------|------------------------|------------------------|------------------------|------------------------|------------------------|------------------------|------------------------|------------------------|------------------------|
| Acidification [Mole of H <sup>+</sup> eq.]                            | 0.114                  | 0.107                  | 0.113                  | 0.125                  | 0.12                   | 0.0888                 | 0.0836                 | 0.149                  | 0.246                  | 0.165                  |
| Climate Change - total [kg CO <sub>2</sub> eq.]                       | 2.17                   | 2.07                   | 3.13                   | 3.52                   | 3.37                   | 3.37                   | 3.04                   | 2.19                   | 4.73                   | 3.48                   |
| Climate Change, biogenic [kg CO <sub>2</sub> eq.]                     | 0.0213                 | 0.0194                 | 0.0248                 | 0.0275                 | 0.0263                 | 0.0245                 | 0.0232                 | 0.00374                | 0.00642                | 0.00394                |
| Climate Change, fossil [kg CO <sub>2</sub> eq.]                       | 2.1                    | 2                      | 1.95                   | 2.23                   | 2.13                   | 2.23                   | 1.95                   | 2.19                   | 4.71                   | 3.17                   |
| Climate Change, land use and land use change [kg CO <sub>2</sub> eq.] | 0.0511                 | 0.0481                 | 1.15                   | 1.27                   | 1.21                   | 1.12                   | 1.06                   | 0.00149                | 0.0121                 | 0.31                   |
| Ecotoxicity, freshwater - total [CTUe]                                | 68.3                   | 64.3                   | 56                     | 61.6                   | 58.9                   | 53.9                   | 50.8                   | 26                     | 75                     | 95.1                   |
| Ecotoxicity, freshwater inorganics [CTUe]                             | 11.7                   | 11                     | 11.3                   | 12.4                   | 11.9                   | 10.2                   | 9.58                   | 6.72                   | 17.3                   | 16.1                   |
| Ecotoxicity, freshwater metals [CTUe]                                 | 44.2                   | 41.6                   | 36.5                   | 40.1                   | 38.4                   | 35.7                   | 33.7                   | 18.1                   | 53.3                   | 65.3                   |
| Ecotoxicity, freshwater organics [CTUe]                               | 12.4                   | 11.7                   | 8.19                   | 9                      | 8.62                   | 7.97                   | 7.52                   | 1.17                   | 4.43                   | 13.7                   |
| Eutrophication, freshwater [kg P eq.]                                 | 0.000427               | 0.000401               | 0.000443               | 0.000487               | 0.000466               | 0.000431               | 0.000408               | 0.000517               | 0.00137                | 0.00119                |
| Eutrophication, marine [kg N eq.]                                     | 0.0297                 | 0.0279                 | 0.028                  | 0.0309                 | 0.0296                 | 0.0288                 | 0.0272                 | 0.0746                 | 0.145                  | 0.0826                 |
| Eutrophication, terrestrial [Mole of N eq.]                           | 0.502                  | 0.469                  | 0.497                  | 0.548                  | 0.525                  | 0.388                  | 0.365                  | 0.661                  | 1.09                   | 0.723                  |
| Human toxicity, cancer - total [CTUh]                                 | 2.51×10 <sup>-9</sup>  | 2.36×10 <sup>-9</sup>  | 2.06×10 <sup>-9</sup>  | 2.26×10 <sup>-9</sup>  | 2.17×10 <sup>-9</sup>  | 2.01×10 <sup>-9</sup>  | 1.90×10 <sup>-9</sup>  | 5.31×10 <sup>-9</sup>  | 7.07×10 <sup>-9</sup>  | 4.29×10 <sup>-9</sup>  |
| Human toxicity, cancer inorganics [CTUh]                              | 6.06×10 <sup>-21</sup> | 5.64×10 <sup>-21</sup> | 7.90×10 <sup>-21</sup> | 8.73×10 <sup>-21</sup> | 8.34×10 <sup>-21</sup> | 7.97×10 <sup>-21</sup> | 7.51×10 <sup>-21</sup> | 2.34×10 <sup>-21</sup> | 3.68×10 <sup>-21</sup> | 1.49×10 <sup>-21</sup> |
| Human toxicity, cancer metals [CTUh]                                  | 2.21×10 <sup>-9</sup>  | 2.08×10 <sup>-9</sup>  | 1.84×10 <sup>-9</sup>  | 2.02×10 <sup>-9</sup>  | 1.94×10 <sup>-9</sup>  | 1.80×10 <sup>-9</sup>  | 1.69×10 <sup>-9</sup>  | 5.03×10 <sup>-9</sup>  | 6.52×10 <sup>-9</sup>  | 3.83×10 <sup>-9</sup>  |
| Human toxicity, cancer organics [CTUh]                                | 2.96×10 <sup>-10</sup> | 2.80×10 <sup>-10</sup> | 2.18×10 <sup>-10</sup> | 2.40×10 <sup>-10</sup> | 2.30×10 <sup>-10</sup> | 2.17×10 <sup>-10</sup> | 2.04×10 <sup>-10</sup> | 2.78×10 <sup>-10</sup> | 5.47×10 <sup>-10</sup> | 4.53×10 <sup>-10</sup> |
| Human toxicity, non-cancer - total [CTUh]                             | 1.47×10 <sup>-7</sup>  | 1.38×10 <sup>-7</sup>  | 1.37×10 <sup>-7</sup>  | 1.50×10 <sup>-7</sup>  | 1.44×10 <sup>-7</sup>  | 1.33×10 <sup>-7</sup>  | 1.26×10 <sup>-7</sup>  | 5.45×10 <sup>-7</sup>  | 4.13×10 <sup>-7</sup>  | 1.51×10 <sup>-7</sup>  |
| Human toxicity, non-cancer inorganics [CTUh]                          | 5.23×10 <sup>-9</sup>  | 4.97×10 <sup>-9</sup>  | 4.93×10 <sup>-9</sup>  | 5.41×10 <sup>-9</sup>  | 5.18×10 <sup>-9</sup>  | 4.91×10 <sup>-9</sup>  | 4.60×10 <sup>-9</sup>  | 5.52×10 <sup>-9</sup>  | 1.10×10 <sup>-8</sup>  | 7.36×10 <sup>-9</sup>  |
| Human toxicity, non-cancer metals [CTUh]                              | 1.40×10 <sup>-7</sup>  | 1.32×10 <sup>-7</sup>  | 1.31×10 <sup>-7</sup>  | 1.44×10 <sup>-7</sup>  | 1.38×10 <sup>-7</sup>  | 1.28×10 <sup>-7</sup>  | 1.20×10 <sup>-7</sup>  | 5.39×10 <sup>-7</sup>  | 4.00×10 <sup>-7</sup>  | 1.41×10 <sup>-7</sup>  |
| Human toxicity, non-cancer organics [CTUh]                            | 1.48×10 <sup>-9</sup>  | 1.41×10 <sup>-9</sup>  | 1.05×10 <sup>-9</sup>  | 1.15×10 <sup>-9</sup>  | 1.11×10 <sup>-9</sup>  | 1.19×10 <sup>-9</sup>  | 9.40×10 <sup>-10</sup> | 6.16×10 <sup>-10</sup> | 2.23×10 <sup>-9</sup>  | 2.67×10 <sup>-9</sup>  |
| Ionising radiation, human health [kBq U235 eq.]                       | 0.0796                 | 0.0769                 | 0.0785                 | 0.0862                 | 0.0826                 | 0.0839                 | 0.0782                 | 0.0956                 | 0.1909                 | 0.1162                 |
| Land Use [Pt]                                                         | 242                    | 227                    | 324                    | 357                    | 341                    | 330                    | 311                    | 105                    | 631                    | 535                    |
| Ozone depletion [kg CFC-11 eq.]                                       | 9.08×10 <sup>-8</sup>  | 8.54×10 <sup>-8</sup>  | 7.75×10 <sup>-8</sup>  | 8.52×10 <sup>-8</sup>  | 8.16×10 <sup>-8</sup>  | 7.55×10 <sup>-8</sup>  | 7.12×10 <sup>-8</sup>  | 7.65×10 <sup>-8</sup>  | 1.99×10 <sup>-7</sup>  | 1.47×10 <sup>-7</sup>  |
| Particulate matter [Disease incidences]                               | 8.90×10 <sup>-7</sup>  | 8.28×10 <sup>-7</sup>  | 8.82×10 <sup>-7</sup>  | 9.73×10 <sup>-7</sup>  | 9.32×10 <sup>-7</sup>  | 7.09×10 <sup>-7</sup>  | 6.69×10 <sup>-7</sup>  | 1.02×10 <sup>-6</sup>  | 1.70×10 <sup>-6</sup>  | 1.14×10 <sup>-6</sup>  |
| Photochemical ozone formation, human health [kg NMVOC eq.]            | 0.005233               | 0.00495                | 0.005053               | 0.00555                | 0.00532                | 0.00503                | 0.0047                 | 0.00616                | 0.012959               | 0.008673               |
| Resource use, fossils [MJ]                                            | 13.3                   | 12.8                   | 13.9                   | 15.3                   | 14.6                   | 14.5                   | 13.6                   | 13.3                   | 27.3                   | 17.2                   |
| Resource use, mineral and metals [kg Sb eq.]                          | 3.81×10 <sup>-5</sup>  | 3.58×10 <sup>-5</sup>  | 3.30×10 <sup>-5</sup>  | 3.63×10 <sup>-5</sup>  | 3.47×10 <sup>-5</sup>  | 3.22×10 <sup>-5</sup>  | 3.03×10 <sup>-5</sup>  | 3.24×10 <sup>-5</sup>  | 8.69×10 <sup>-5</sup>  | 6.45×10 <sup>-5</sup>  |
| Water use [m <sup>3</sup> world equiv.]                               | 5.17                   | 4.85                   | 5.12                   | 5.69                   | 5.39                   | 5.04                   | 4.75                   | 5.83                   | 10.35                  | 11.80                  |
